# Supplementary material for: Design and Evaluation of Complex Polypeptide-Loaded Dissolving Microneedles for Improving Facial Wrinkles in Different Areas
Source: MDPI journal article supplement (doi:10.3390/polym14214475), 2022-10-22
Supplement: s1 [file s1]

**Table S1. The specific inclusion and non-inclusion criteria for selecting subjects.**

| Inclusion criteria                                                                                     | Non-inclusion criteria                                                                                           |
|--------------------------------------------------------------------------------------------------------|------------------------------------------------------------------------------------------------------------------|
| Female healthy subjects                                                                                | Pregnant and breastfeeding woman                                                                                 |
| Age range: 40 to 70 years old                                                                          | A history of allergies or sensitivity to cosmetic products, toiletries, sunscreens and/or topical drugs.         |
| Type: Asian                                                                                            | Volunteers with dermatological / ophthalmological problems on the test area.                                     |
| Showing visible Crow's Feet, Under the eyes fine lines, Nasolabial Folds and forehead and frown lines. | Volunteers with pharmacological treatment (locally or systemically) in progress.                                 |
| Volunteers who have not involved in any other similar studies since less than two months.              | Sunburn, suntan, scars, or active dermal lesions on the test area.                                               |
| Willingness to not expose to sun/solar lamps during the study period.                                  | Subjects accustomed to use tanning beds.                                                                         |
| Willingness to not vary the normal daily routine.                                                      | Subject having a skin condition that the investigator deems inappropriate for participation.                     |
| Volunteers aware of the test procedure and having signed an informed consent form.                     | Subject under pharmacological treatment (locally or systemically) that could interfere with the study treatment. |

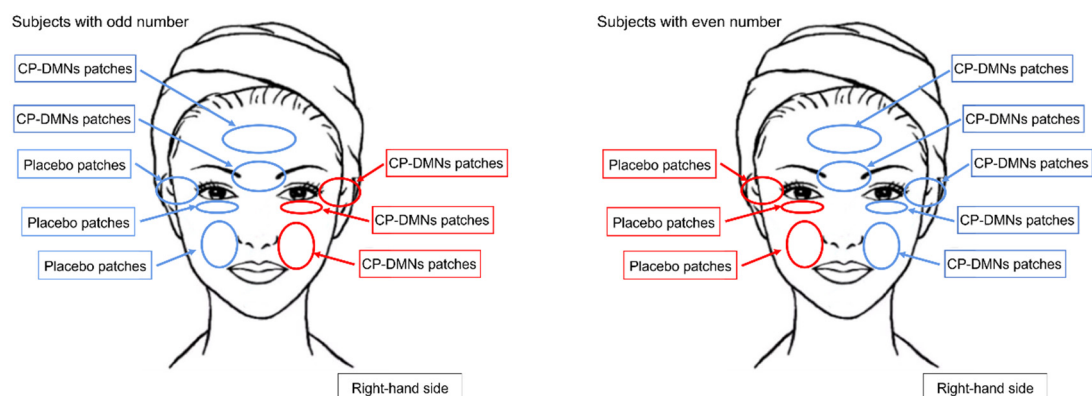

**Figure S1. The detailed DMNs distribution diagram.**
